# Supplementary material for: Governmental Incentives, Satisfaction with Health Promotional Materials, and COVID-19 Vaccination Uptake among Community-Dwelling Older Adults in Hong Kong: A Random Telephone Survey
Source: MDPI journal article supplement (doi:10.3390/vaccines10050732), 2022-05-06
Supplement: s1 [file s1]

Supplementary S2. Comparing participants aged 65-74 years with those aged 75 years or above.

Table S2. Comparing background characteristics of the participants aged 65-74 years with those aged 75 years or above.

| those aged 75 years or above.                                          | Participants<br>aged 65-74<br>years<br>(n=366) | Participants<br>aged 75 years<br>or above<br>(n=74) | P<br>values |
|------------------------------------------------------------------------|------------------------------------------------|-----------------------------------------------------|-------------|
|                                                                        | n (%)                                          | n (%)                                               |             |
| <b>Sociodemographic characteristics</b>                                |                                                |                                                     |             |
| Gender                                                                 |                                                |                                                     |             |
| Male                                                                   | 138 (37.7)                                     | 33 (44.6)                                           | 0.27        |
| Female                                                                 | 228 (62.3)                                     | 41 (55.4)                                           |             |
| Relationship status                                                    |                                                |                                                     |             |
| Currently single                                                       | 84 (23.0)                                      | 29 (39.2)                                           | 0.004       |
| Married or cohabited with a partner                                    | 282 (77.0)                                     | 45 (60.8)                                           |             |
| Education level                                                        |                                                |                                                     |             |
| Primary or below                                                       | 155 (42.3)                                     | 32 (43.2)                                           | 0.94        |
| Secondary                                                              | 175 (47.8)                                     | 34 (45.9)                                           |             |
| Tertiary or above                                                      | 36 (9.8)                                       | 8 (10.8)                                            |             |
| Current employment status                                              |                                                |                                                     |             |
| Unemployed/retired/housewife                                           | 305 (83.3)                                     | 72 (97.3)                                           | 0.002       |
| Full-time/part-time                                                    | 61 (16.7)                                      | 2 (2.7)                                             |             |
| Monthly household income, HK\$ (US\$)                                  |                                                |                                                     |             |
| <20,000 (2,580)                                                        | 272 (74.3)                                     | 56 (75.7)                                           | 0.96        |
| ≥20,000 (2,580)                                                        | 49 (13.4)                                      | 9 (12.2)                                            |             |
| Refuse to disclose                                                     | 45 (12.3)                                      | 9 (12.2)                                            |             |
| Receiving Comprehensive Social Security Assistance (CSSA) <sup>1</sup> |                                                |                                                     |             |
| No                                                                     | 338 (92.3)                                     | 70 (94.6)                                           | 0.50        |
| Yes                                                                    | 28 (7.7)                                       | 4 (5.4)                                             |             |
| Living alone                                                           |                                                |                                                     |             |
| No                                                                     | 309 (84.4)                                     | 50 (67.6)                                           | 0.001       |
| Yes                                                                    | 57 (15.6)                                      | 24 (32.4)                                           |             |
| <b>Lifestyles and health conditions</b>                                |                                                |                                                     |             |
| Smoking in the past year                                               |                                                |                                                     |             |
| No                                                                     | 342 (93.4)                                     | 67 (90.5)                                           | 0.37        |
| Yes                                                                    | 24 (6.6)                                       | 7 (9.5)                                             |             |
| Binge drinking in the past year                                        |                                                |                                                     |             |
| No                                                                     | 359 (98.1)                                     | 71 (95.9)                                           | 0.26        |
| Yes                                                                    | 7 (1.9)                                        | 3 (4.1)                                             |             |
| Presence of the following chronic conditions, Yes                      |                                                |                                                     |             |
| Hypertension                                                           | 172 (47.0)                                     | 40 (54.1)                                           | 0.27        |
| Chronic cardiovascular diseases                                        | 35 (9.6)                                       | 11 (14.9)                                           | 0.17        |
| Chronic lung diseases                                                  | 6 (1.6)                                        | 2 (2.7)                                             | 0.53        |

|                                           |            |           |      |
|-------------------------------------------|------------|-----------|------|
| Chronic liver diseases                    | 10 (2.7)   | 0 (0.0)   | 0.15 |
| Chronic kidney diseases                   | 3 (0.8)    | 0 (0.0)   | 0.44 |
| Diabetes Mellitus                         | 67 (18.3)  | 16 (21.6) | 0.51 |
| Any of above                              | 217 (59.3) | 51 (68.9) | 0.12 |
| History of COVID-19                       |            |           |      |
| No                                        | 361 (98.6) | 71 (95.9) |      |
| Yes                                       | 5 (1.4)    | 3 (4.1)   | 0.11 |
| <b>Uptake of other vaccination</b>        |            |           |      |
| History of seasonal influenza vaccination |            |           |      |
| No                                        | 155 (42.3) | 21 (28.4) |      |
| Yes                                       | 211 (57.7) | 53 (71.6) | 0.03 |
| History of pneumococcal vaccination       |            |           |      |
| No                                        | 281 (76.8) | 48 (64.9) |      |
| Yes                                       | 85 (23.2)  | 26 (35.1) | 0.03 |

---

1 CSSA: a governmental financial support scheme providing a safety net for those who cannot support themselves financially.

P values were obtained by using Chi-square tests (for categorical variables) and independent sample t-tests (for continuous variables)

Table S3. Comparing COVID-19 vaccination uptake and other independent variables of interest between participants aged 65-74 years and those aged 75 years or above.

|                                                                                                                                  | Participants<br>aged 65-74<br>years<br>(n=366)<br>n (%) | Participants<br>aged 75 years<br>or above<br>(n=74)<br>n (%) | P<br>values |
|----------------------------------------------------------------------------------------------------------------------------------|---------------------------------------------------------|--------------------------------------------------------------|-------------|
| <b>COVID-19 vaccination uptake</b>                                                                                               |                                                         |                                                              |             |
| Number of doses of COVID-19 vaccination received by the participants                                                             |                                                         |                                                              |             |
| 0                                                                                                                                | 134 (36.7)                                              | 38 (51.3)                                                    | 0.01        |
| 1                                                                                                                                | 6 (1.6)                                                 | 4 (5.4)                                                      |             |
| 2                                                                                                                                | 225 (61.6)                                              | 32 (43.2)                                                    |             |
| <b>Perceived impacts of incentives provided by the government in increasing one's motivation to receive COVID-19 vaccination</b> |                                                         |                                                              |             |
| Lottery for winning prizes                                                                                                       |                                                         |                                                              |             |
| Almost none                                                                                                                      | 314 (85.8)                                              | 68 (91.9)                                                    | 0.38        |
| Small                                                                                                                            | 15 (4.1)                                                | 3 (4.1)                                                      |             |
| Moderate                                                                                                                         | 21 (5.7)                                                | 1 (1.4)                                                      |             |
| Large                                                                                                                            | 16 (4.4)                                                | 2 (2.7)                                                      |             |
| Item score, mean (SD)                                                                                                            | 1.3 (0.7)                                               | 1.2 (0.6)                                                    | 0.08        |
| Visiting mainland China or other places without quarantine                                                                       |                                                         |                                                              |             |
| Almost none                                                                                                                      | 201 (54.9)                                              | 47 (63.5)                                                    | 0.45        |
| Small                                                                                                                            | 41 (11.2)                                               | 9 (12.2)                                                     |             |
| Moderate                                                                                                                         | 52 (14.2)                                               | 7 (9.5)                                                      |             |
| Large                                                                                                                            | 72 (19.7)                                               | 11 (14.9)                                                    |             |
| Item score, mean (SD)                                                                                                            | 2.0 (1.2)                                               | 1.8 (1.1)                                                    | 0.14        |
| Allowing visit of elderly homes and hospitals without COVID-19 testing                                                           |                                                         |                                                              |             |
| Almost none                                                                                                                      | 258 (70.5)                                              | 50 (67.6)                                                    | 0.48        |
| Small                                                                                                                            | 35 (9.6)                                                | 10 (13.5)                                                    |             |
| Moderate                                                                                                                         | 34 (9.3)                                                | 9 (12.2)                                                     |             |
| Large                                                                                                                            | 39 (10.7)                                               | 5 (6.8)                                                      |             |
| Item score, mean (SD)                                                                                                            | 1.6 (1.0)                                               | 1.6 (0.9)                                                    | 0.88        |
| Entering bars or clubs                                                                                                           |                                                         |                                                              |             |
| Almost none                                                                                                                      | 329 (89.9)                                              | 66 (89.2)                                                    | 0.76        |
| Small                                                                                                                            | 21 (5.7)                                                | 4 (5.4)                                                      |             |
| Moderate                                                                                                                         | 13 (3.6)                                                | 4 (5.4)                                                      |             |
| Large                                                                                                                            | 3 (0.8)                                                 | 0 (0.0)                                                      |             |
| Item score, mean (SD)                                                                                                            | 1.2 (0.5)                                               | 1.2 (0.5)                                                    | 0.89        |
| Walk-in vaccination services for older adults                                                                                    |                                                         |                                                              |             |

|                                                                                                                                             |            |           |       |
|---------------------------------------------------------------------------------------------------------------------------------------------|------------|-----------|-------|
| without prior booking                                                                                                                       |            |           |       |
| Almost none                                                                                                                                 | 284 (77.6) | 52 (70.3) |       |
| Small                                                                                                                                       | 12 (3.3)   | 9 (12.2)  |       |
| Moderate                                                                                                                                    | 28 (7.7)   | 6 (8.1)   |       |
| Large                                                                                                                                       | 42 (11.5)  | 7 (9.5)   | 0.01  |
| Item score, mean (SD)                                                                                                                       | 1.5 (1.0)  | 1.6 (1.0) | 0.78  |
| <b>Satisfaction of COVID-19 vaccination health promotion materials (e.g., advertisement, poster, and others) produced by the government</b> |            |           |       |
| Whether the information are easy to understand                                                                                              |            |           |       |
| No/uncertain                                                                                                                                | 34 (9.3)   | 15 (20.3) |       |
| Yes                                                                                                                                         | 332 (90.7) | 59 (79.7) | 0.01  |
| Whether the materials can address your concerns related to COVID-19 vaccination                                                             |            |           |       |
| No/uncertain                                                                                                                                | 211 (57.7) | 46 (62.2) |       |
| Yes                                                                                                                                         | 155 (42.3) | 28 (37.8) | 0.47  |
| Whether the materials are helpful for you to make decision to receive a COVID-19 vaccine                                                    |            |           |       |
| No/uncertain                                                                                                                                | 188 (51.4) | 40 (54.1) |       |
| Yes                                                                                                                                         | 178 (48.6) | 34 (45.9) | 0.67  |
| <b>Perceptions related to COVID-19 vaccination</b>                                                                                          |            |           |       |
| Attitudes toward COVID-19 vaccination, agree                                                                                                |            |           |       |
| The protection offered by the COVID-19 vaccination is weaker among people with older age                                                    | 55 (15.0)  | 20 (27.0) | 0.01  |
| The level of side effects of COVID-19 vaccination is severer among people with older age                                                    | 97 (26.5)  | 28 (37.8) | 0.049 |
| Presence of chronic diseases would decrease the protection of COVID-19 vaccination                                                          | 107 (29.2) | 28 (37.8) | 0.14  |
| COVID-19 vaccination would negatively affect the control of existing chronic conditions                                                     | 92 (25.1)  | 27 (36.5) | 0.045 |
| Attitudes Scale <sup>1</sup> , mean (SD)                                                                                                    | 7.5 (2.5)  | 8.4 (2.5) | 0.004 |
| <b>Subjective norm related to COVID-19 vaccination, agree</b>                                                                               |            |           |       |
| Your family doctors would not support you to take up COVID-19 vaccination                                                                   | 26 (7.1)   | 8 (10.8)  | 0.28  |
| Your children or other family members would not support you to take up COVID-19 vaccination                                                 | 68 (18.6)  | 18 (24.3) | 0.26  |

|                                                                       |            |           |      |
|-----------------------------------------------------------------------|------------|-----------|------|
| Subjective Norm Scale <sup>2</sup> , mean (SD)                        | 3.3 (1.1)  | 3.5 (1.2) | 0.19 |
| Perceived behavioral control to take up COVID-19 vaccination, agree   |            |           |      |
| You are confident to receive COVID-19 vaccination if you want to      | 346 (94.5) | 68 (91.9) | 0.38 |
| Item score, mean (SD)                                                 | 2.9 (0.4)  | 2.9 (0.4) | 0.62 |
| Decisional conflicts, agree                                           |            |           |      |
| You are sure about which type of COVID-19 vaccine is suitable for you | 259 (70.8) | 43 (58.1) | 0.03 |
| You are sure about which type of COVID-19 vaccine you should choose   | 262 (71.6) | 45 (60.8) | 0.07 |
| Decisional Conflict Scale <sup>3</sup> , mean (SD)                    | 5.3 (1.1)  | 5.1 (1.1) | 0.10 |

<sup>1</sup> Attitudes Scale: 4 items, Cronbach's alpha: 0.84, one factor was identified by exploratory factor analysis, explaining for 56.1% of total variance

<sup>2</sup> Subjective Norm Scale: 2 items, Cronbach's alpha: 0.72, one factor was identified by exploratory factor analysis, explaining for 67.8% of total variance

<sup>3</sup> Decisional Conflict Scale, 2 items, Cronbach's alpha: 0.94, one factor was identified by exploratory factor analysis, explaining for 94.6% of total variance

P values were obtained by using Chi-square tests (for categorical variables) and independent sample t-tests (for continuous variables)

Table S4. Associations between background characteristics and completion of primary COVID-19 vaccination series among participants aged 65-74 years and 75 years or above.

|                                                                        | Participants aged 65-74 years |          | Participants aged 75 years or above |          |
|------------------------------------------------------------------------|-------------------------------|----------|-------------------------------------|----------|
|                                                                        | OR (95%CI)                    | P values | OR (95%CI)                          | P values |
| <b>Sociodemographic characteristics</b>                                |                               |          |                                     |          |
| Gender                                                                 |                               |          |                                     |          |
| Male                                                                   | 1.0                           |          | 1.0                                 |          |
| Female                                                                 | 0.90 (0.58, 1.39)             | 0.63     | 1.67 (0.65, 4.25)                   | 0.29     |
| Relationship status                                                    |                               |          |                                     |          |
| Currently single                                                       | 1.0                           |          | 1.0                                 |          |
| Married or cohabited with a partner                                    | 1.19 (0.72, 1.95)             | 0.50     | 0.89 (0.35, 2.31)                   | 0.83     |
| Education level                                                        |                               |          |                                     |          |
| Primary or below                                                       | 1.0                           |          | 1.0                                 |          |
| Secondary                                                              | 1.26 (0.81, 1.96)             | 0.30     | 0.90 (0.34, 2.36)                   | 0.82     |
| Tertiary or above                                                      | 3.91 (1.54, 9.93)             | 0.004    | 0.38 (0.07, 2.16)                   | 0.27     |
| Current employment status                                              |                               |          |                                     |          |
| Unemployed/retired/housewife                                           | 1.0                           |          | 1.0                                 |          |
| Full-time/part-time                                                    | 1.95 (1.06, 3.61)             | 0.03     | 1.32 (0.08, 21.99)                  | 0.85     |
| Monthly household income, HK\$ (US\$)                                  |                               |          |                                     |          |
| <20,000 (2,580)                                                        | 1.0                           |          | 1.0                                 |          |
| ≥20,000 (2,580)                                                        | 1.02 (0.55, 1.91)             | 0.94     | 1.24 (0.30, 5.12)                   | 0.77     |
| Refuse to disclose                                                     | 1.30 (0.67, 2.52)             | 0.44     | 3.09 (0.70, 13.66)                  | 0.14     |
| Receiving Comprehensive Social Security Assistance (CSSA) <sup>1</sup> |                               |          |                                     |          |
| No                                                                     | 1.0                           |          | 1.0                                 |          |
| Yes                                                                    | 0.38 (0.17, 0.83)             | 0.02     | N.A.                                | N.A.     |
| Living alone                                                           |                               |          |                                     |          |
| No                                                                     | 1.0                           |          | 1.0                                 |          |
| Yes                                                                    | 0.77 (0.43, 1.36)             | 0.37     | 0.70 (0.26, 1.91)                   | 0.49     |
| <b>Lifestyles and health conditions</b>                                |                               |          |                                     |          |
| Smoking in the past year                                               |                               |          |                                     |          |
| No                                                                     | 1.0                           |          | 1.0                                 |          |
| Yes                                                                    | 0.51 (0.22, 1.16)             | 0.11     | 1.86 (0.39, 8.96)                   | 0.44     |
| Binge drinking in the past year                                        |                               |          |                                     |          |
| No                                                                     | 1.0                           |          | 1.0                                 |          |
| Yes                                                                    | 0.46 (0.10, 2.10)             | 0.32     | N.A.                                | N.A.     |

|                                           |                   |      |                   |       |
|-------------------------------------------|-------------------|------|-------------------|-------|
| Presence of chronic conditions            |                   |      |                   |       |
| No                                        | 1.0               |      | 1.0               |       |
| Yes                                       | 0.63 (0.41, 0.98) | 0.04 | 1.67 (0.60, 4.62) | 0.33  |
| History of COVID-19                       |                   |      |                   |       |
| No                                        | 1.0               |      | 1.0               |       |
| Yes                                       | 0.41 (0.07, 2.50) | 0.34 | 0.65 (0.06, 7.45) | 0.73  |
| <b>Uptake of other vaccination</b>        |                   |      |                   |       |
| History of seasonal influenza vaccination |                   |      |                   |       |
| No                                        | 1.0               |      | 1.0               |       |
| Yes                                       | 1.48 (0.97, 2.26) | 0.07 | 1.79 (0.62, 5.13) | 0.28  |
| History of pneumococcal vaccination       |                   |      |                   |       |
| No                                        | 1.0               |      | 1.0               |       |
| Yes                                       | 2.10 (1.23, 3.61) | 0.01 | 2.49 (1.00, 6.62) | 0.048 |

OR: crude odds ratios, CI: confidence interval

Table S5. Factors associated with completion of primary COVID-19 vaccination series among participants aged 65-74 years and 75 years or above.

[illegible]



|                                                                                                     |                    |        |                    |        |                    |        |                    |        |  |
|-----------------------------------------------------------------------------------------------------|--------------------|--------|--------------------|--------|--------------------|--------|--------------------|--------|--|
| <b>others) produced by the government</b>                                                           |                    |        |                    |        |                    |        |                    |        |  |
| Whether the information are easy to understand                                                      |                    |        |                    |        |                    |        |                    |        |  |
| No/uncertain                                                                                        | 1.0                |        | 1.0                |        | 1.0                |        | 10                 |        |  |
| Yes                                                                                                 | 1.47 (0.72, 2.99)  | 0.29   | 1.34 (0.62, 2.88)  | 0.46   | 1.69 (0.51, 5.54)  | 0.39   | 2.03 (0.58, 7.03)  | 0.27   |  |
| Whether the materials can address your concerns related to COVID-19 vaccination                     |                    |        |                    |        |                    |        |                    |        |  |
| No/uncertain                                                                                        | 1.00               |        | 1.0                |        | 1.0                |        | 1.0                |        |  |
| Yes                                                                                                 | 3.88 (2.42, 6.20)  | <0.001 | 4.20 (2.56, 6.90)  | <0.001 | 5.36 (1.93, 14.87) | 0.001  | 5.45 (1.91, 15.55) | 0.002  |  |
| Whether the materials are helpful for you to make decision on whether to receive a COVID-19 vaccine |                    |        |                    |        |                    |        |                    |        |  |
| No/uncertain                                                                                        | 1.0                |        | 1.0                |        | 1.0                |        | 1.0                |        |  |
| Yes                                                                                                 | 4.23 (2.68, 6.67)  | <0.001 | 4.53 (2.79, 7.35)  | <0.001 | 7.20 (2.56, 20.23) | <0.001 | 7.05 (2.36, 20.22) | <0.001 |  |
| <b>Perceptions related to COVID-19 vaccination</b>                                                  |                    |        |                    |        |                    |        |                    |        |  |
| Attitudes Scale                                                                                     | 0.59 (0.53, 0.67)  | <0.001 | 0.59 (0.53, 0.57)  | <0.001 | 0.75 (0.60, 0.92)  | 0.01   | 0.77 (0.62, 0.96)  | 0.02   |  |
| Subjective Norm Scale                                                                               | 0.55 (0.45, 0.67)  | <0.001 | 0.53 (0.43, 0.66)  | <0.001 | 0.65 (0.43, 0.99)  | 0.045  | 0.64 (0.42, 0.98)  | 0.04   |  |
| Perceived behavioral control to take up COVID-19 vaccination                                        | 8.98 (2.38, 33.97) | 0.001  | 8.12 (2.22, 29.69) | 0.002  | 3.61 (0.52, 24.94) | 0.19   | 3.17 (0.55, 25.16) | 0.18   |  |
| Decisional Conflict Scale                                                                           | 2.55 (2.00, 3.25)  | <0.001 | 2.52 (1.96, 3.23)  | <0.001 | 2.13 (1.28, 3.53)  | 0.004  | 2.14 (1.27, 3.58)  | 0.004  |  |

OR: crude odds ratios, CI: confidence interval

AOR: adjusted odds ratios, odds ratios adjusted for significant background characteristics listed in Table 3.
