# Supplementary material for: Governmental Incentives, Satisfaction with Health Promotional Materials, and COVID-19 Vaccination Uptake among Community-Dwelling Older Adults in Hong Kong: A Random Telephone Survey
Source: MDPI journal article supplement (doi:10.3390/vaccines10050732), 2022-05-06
Supplement: s1 [file s1]

Supplementary S1. Comparing COVID-19 vaccination uptake and independent variables of interest before and after the fifth wave of COVID-19 outbreak in Hong Kong.

Table S1. Comparing COVID-19 vaccination uptake and other independent variables of interest between participants recruited before and after the fifth wave of COVID-19 outbreak in Hong Kong.

|                                                                                                                                          | Before the 5 <sup>th</sup><br>wave of<br>outbreak<br>(n=409)<br>n (%) | After the 5 <sup>th</sup><br>wave of<br>outbreak<br>(n=31)<br>n (%) | P<br>values |
|------------------------------------------------------------------------------------------------------------------------------------------|-----------------------------------------------------------------------|---------------------------------------------------------------------|-------------|
| <b>COVID-19 vaccination uptake</b>                                                                                                       |                                                                       |                                                                     |             |
| Number of doses of COVID-19 vaccination<br>received by the participants                                                                  |                                                                       |                                                                     |             |
| 0                                                                                                                                        | 167 (40.8)                                                            | 6 (19.4)                                                            | 0.03        |
| 1                                                                                                                                        | 10 (2.4)                                                              | 0 (0.0)                                                             |             |
| 2                                                                                                                                        | 232 (56.7)                                                            | 25 (80.6)                                                           |             |
| <b>Perceived impacts of incentives provided by<br/>the government in increasing one's motivation<br/>to receive COVID-19 vaccination</b> |                                                                       |                                                                     |             |
| Lottery for winning prizes                                                                                                               |                                                                       |                                                                     |             |
| Almost none                                                                                                                              | 352 (92.1)                                                            | 30 (96.8)                                                           | 0.35        |
| Small                                                                                                                                    | 18 (4.4)                                                              | 0 (0.0)                                                             |             |
| Moderate                                                                                                                                 | 21 (5.1)                                                              | 1 (3.2)                                                             |             |
| Large                                                                                                                                    | 18 (4.4)                                                              | 0 (0.0)                                                             |             |
| Item score, mean (SD)                                                                                                                    | 1.3 (0.7)                                                             | 1.1 (0.4)                                                           | 0.01        |
| Visiting mainland China or other places without<br>quarantine                                                                            |                                                                       |                                                                     |             |
| Almost none                                                                                                                              | 229 (56.0)                                                            | 19 (61.3)                                                           | 0.01        |
| Small                                                                                                                                    | 42 (10.3)                                                             | 8 (25.8)                                                            |             |
| Moderate                                                                                                                                 | 56 (13.7)                                                             | 3 (9.7)                                                             |             |
| Large                                                                                                                                    | 82 (20.0)                                                             | 1 (3.2)                                                             |             |
| Item score, mean (SD)                                                                                                                    | 2.0 (1.3)                                                             | 1.6 (0.8)                                                           | 0.01        |
| Allowing visit of elderly homes and hospitals<br>without COVID-19 testing                                                                |                                                                       |                                                                     |             |
| Almost none                                                                                                                              | 288 (70.4)                                                            | 20 (64.5)                                                           | 0.19        |
| Small                                                                                                                                    | 39 (9.5)                                                              | 6 (19.4)                                                            |             |
| Moderate                                                                                                                                 | 39 (9.5)                                                              | 4 (12.9)                                                            |             |
| Large                                                                                                                                    | 43 (10.5)                                                             | 1 (3.2)                                                             |             |
| Item score, mean (SD)                                                                                                                    | 1.6 (1.0)                                                             | 1.6 (0.9)                                                           | 0.78        |
| Entering bars or clubs                                                                                                                   |                                                                       |                                                                     |             |
| Almost none                                                                                                                              | 367 (89.7)                                                            | 28 (90.3)                                                           | 0.76        |
| Small                                                                                                                                    | 24 (5.9)                                                              | 1 (3.2)                                                             |             |
| Moderate                                                                                                                                 | 15 (3.7)                                                              | 2 (6.5)                                                             |             |
| Large                                                                                                                                    | 3 (0.7)                                                               | 0 (0.0)                                                             |             |

|                                                                                                                                             |            |           |        |
|---------------------------------------------------------------------------------------------------------------------------------------------|------------|-----------|--------|
| Item score, mean (SD)                                                                                                                       | 1.2 (0.5)  | 1.2 (0.5) | 0.94   |
| Walk-in vaccination services for older adults without prior booking                                                                         |            |           |        |
| Almost none                                                                                                                                 | 307 (75.1) | 29 (93.5) |        |
| Small                                                                                                                                       | 20 (4.9)   | 1 (3.2)   |        |
| Moderate                                                                                                                                    | 34 (8.3)   | 0 (0.0)   |        |
| Large                                                                                                                                       | 48 (11.7)  | 1 (3.2)   | 0.12   |
| Item score, mean (SD)                                                                                                                       | 1.7 (1.1)  | 1.1 (0.6) | <0.001 |
| <b>Satisfaction of COVID-19 vaccination health promotion materials (e.g., advertisement, poster, and others) produced by the government</b> |            |           |        |
| Whether the information are easy to understand                                                                                              |            |           |        |
| No/uncertain                                                                                                                                | 46 (11.2)  | 3 (9.7)   |        |
| Yes                                                                                                                                         | 363 (88.8) | 28 (90.3) | 0.79   |
| Whether the materials can address your concerns related to COVID-19 vaccination                                                             |            |           |        |
| No/uncertain                                                                                                                                | 243 (59.4) | 14 (45.2) |        |
| Yes                                                                                                                                         | 166 (40.6) | 17 (54.8) | 0.12   |
| Whether the materials are helpful for you to make decision to receive a COVID-19 vaccine                                                    |            |           |        |
| No/uncertain                                                                                                                                | 214 (52.3) | 14 (45.2) |        |
| Yes                                                                                                                                         | 195 (47.7) | 17 (54.8) | 0.44   |
| <b>Perceptions related to COVID-19 vaccination</b>                                                                                          |            |           |        |
| Attitudes toward COVID-19 vaccination, agree                                                                                                |            |           |        |
| The protection offered by the COVID-19 vaccination is weaker among people with older age                                                    | 70 (17.1)  | 5 (16.1)  | 0.89   |
| The level of side effects of COVID-19 vaccination is severer among people with older age                                                    | 122 (29.8) | 3 (9.7)   | 0.02   |
| Presence of chronic diseases would decrease the protection of COVID-19 vaccination                                                          | 128 (31.3) | 7 (22.6)  | 0.31   |
| COVID-19 vaccination would negatively affect the control of existing chronic conditions                                                     | 114 (27.9) | 5 (16.1)  | 0.16   |
| Attitudes Scale <sup>1</sup> , mean (SD)                                                                                                    | 7.7 (2.5)  | 6.9 (2.4) | 0.09   |
| Subjective norm related to COVID-19 vaccination, agree                                                                                      |            |           |        |
| Your family doctors would not support you to take up COVID-19 vaccination                                                                   | 31 (7.6)   | 3 (9.7)   | 0.67   |

|                                                                                             |            |           |      |
|---------------------------------------------------------------------------------------------|------------|-----------|------|
| Your children or other family members would not support you to take up COVID-19 vaccination | 78 (19.1)  | 8 (25.8)  | 0.36 |
| Subjective Norm Scale <sup>2</sup> , mean (SD)                                              | 3.4 (1.1)  | 3.2 (1.3) | 0.34 |
| Perceived behavioral control to take up COVID-19 vaccination, agree                         |            |           |      |
| You are confident to receive COVID-19 vaccination if you want to                            | 384 (92.8) | 30 (96.8) | 0.51 |
| Item score, mean (SD)                                                                       | 2.9 (0.4)  | 3.0 (0.2) | 0.39 |
| Decisional conflicts, agree                                                                 |            |           |      |
| You are sure about which type of COVID-19 vaccine is suitable for you                       | 277 (67.7) | 25 (80.6) | 0.14 |
| You are sure about which type of COVID-19 vaccine you should choose                         | 282 (68.9) | 25 (80.6) | 0.17 |
| Decisional Conflict Scale <sup>3</sup> , mean (SD)                                          | 5.3 (1.1)  | 5.5 (1.0) | 0.17 |

P values were obtained by using Chi-square tests (for categorical variables) and independent sample t-tests (for continuous variables)

<sup>1</sup> Attitudes Scale: 4 items, Cronbach's alpha: 0.84, one factor was identified by exploratory factor analysis, explaining for 56.1% of total variance

<sup>2</sup> Subjective Norm Scale: 2 items, Cronbach's alpha: 0.72, one factor was identified by exploratory factor analysis, explaining for 67.8% of total variance

<sup>3</sup> Decisional Conflict Scale, 2 items, Cronbach's alpha: 0.94, one factor was identified by exploratory factor analysis, explaining for 94.6% of total variance
